# Supplementary material for: Nucleosome fragility is associated with future transcriptional response to developmental cues and stress in C. elegans
Source: PubMed Central journal article supplement — Genome Res. 2017 Jan;27(1):75–86. doi: 10.1101/gr.208173.116 (PMC5204346; doi:10.1101/gr.208173.116), 2017-01
Supplement: supp_gr.208173.116_Supplemental_Table_S1.pdf [file supp_gr.208173.116_Supplemental_Table_S1.pdf]

**Table S1: Additional datasets used in this study**

| <b>Dataset</b>                            | <b>Figure</b> | <b>Reference</b>                                                           | <b>Source</b>                                                                                                                   |
|-------------------------------------------|---------------|----------------------------------------------------------------------------|---------------------------------------------------------------------------------------------------------------------------------|
| <i>In vitro</i> reconstituted nucleosomes | 2a, 5c, 5d    | Locke et al., BMC Genomics 2013                                            | SRA050182                                                                                                                       |
| Sequence-dependent nucleosome model       | 2a            | Kaplan et al., Nature 2009                                                 | <a href="http://genie.weizmann.ac.il/software/nucleo_genomes.html">http://genie.weizmann.ac.il/software/nucleo_genomes.html</a> |
| Transcription factor binding sites        | 2, SF6        | Boyle et al., Nature 2014<br>Araya et al., Nature 2014                     | <a href="https://www.encodeproject.org/comparative/regulation/">https://www.encodeproject.org/comparative/regulation/</a>       |
| HTZ-1                                     | 4d, SF6       | Ho et al., Nature 2014                                                     | <a href="https://www.encodeproject.org/comparative/chromatin/">https://www.encodeproject.org/comparative/chromatin/</a>         |
| GC content                                | 4, SF6        | UCSC table browser                                                         | <a href="https://genome.ucsc.edu/">https://genome.ucsc.edu/</a>                                                                 |
| PhastCons 7 way Conservation Score        |               | UCSC table browser                                                         | <a href="https://genome.ucsc.edu/">https://genome.ucsc.edu/</a>                                                                 |
| Developmental RNA-seq                     | 6             | Spencer and Zeller et al., Genome Res 2011<br>Gerstein et al., Nature 2014 | <a href="https://www.encodeproject.org/comparative/transcriptome/">https://www.encodeproject.org/comparative/transcriptome/</a> |
| Histone PTMs                              | SF7           | Ho et al., Nature 2014                                                     | <a href="https://www.encodeproject.org/comparative/chromatin/">https://www.encodeproject.org/comparative/chromatin/</a>         |
| DNA physical properties                   | SF7           | Zhou et al., NAR 2013                                                      | <a href="http://rohslab.cmb.usc.edu/DNAshape/">http://rohslab.cmb.usc.edu/DNAshape/</a>                                         |
| 80 mM nucleosomes                         | SF7           | Ooi et al., Genome Res 2010                                                | GSE18898                                                                                                                        |
| H3.3 ChIP-chip                            | SF7           | Ooi et al., Genome Res 2010                                                | GSE18898                                                                                                                        |
| hiHMM Chromatin states                    | SF7           | Ho et al., Nature 2014                                                     | <a href="https://www.encodeproject.org/comparative/chromatin/">https://www.encodeproject.org/comparative/chromatin/</a>         |
