# Supplementary figures and images for: Nucleosome fragility is associated with future transcriptional response to developmental cues and stress in C. elegans
Source: PubMed Central journal article supplement — Genome Res. 2017 Jan;27(1):75–86. doi: 10.1101/gr.208173.116 (PMC5204346; doi:10.1101/gr.208173.116), 2017-01

**Supplemental Figure S1**

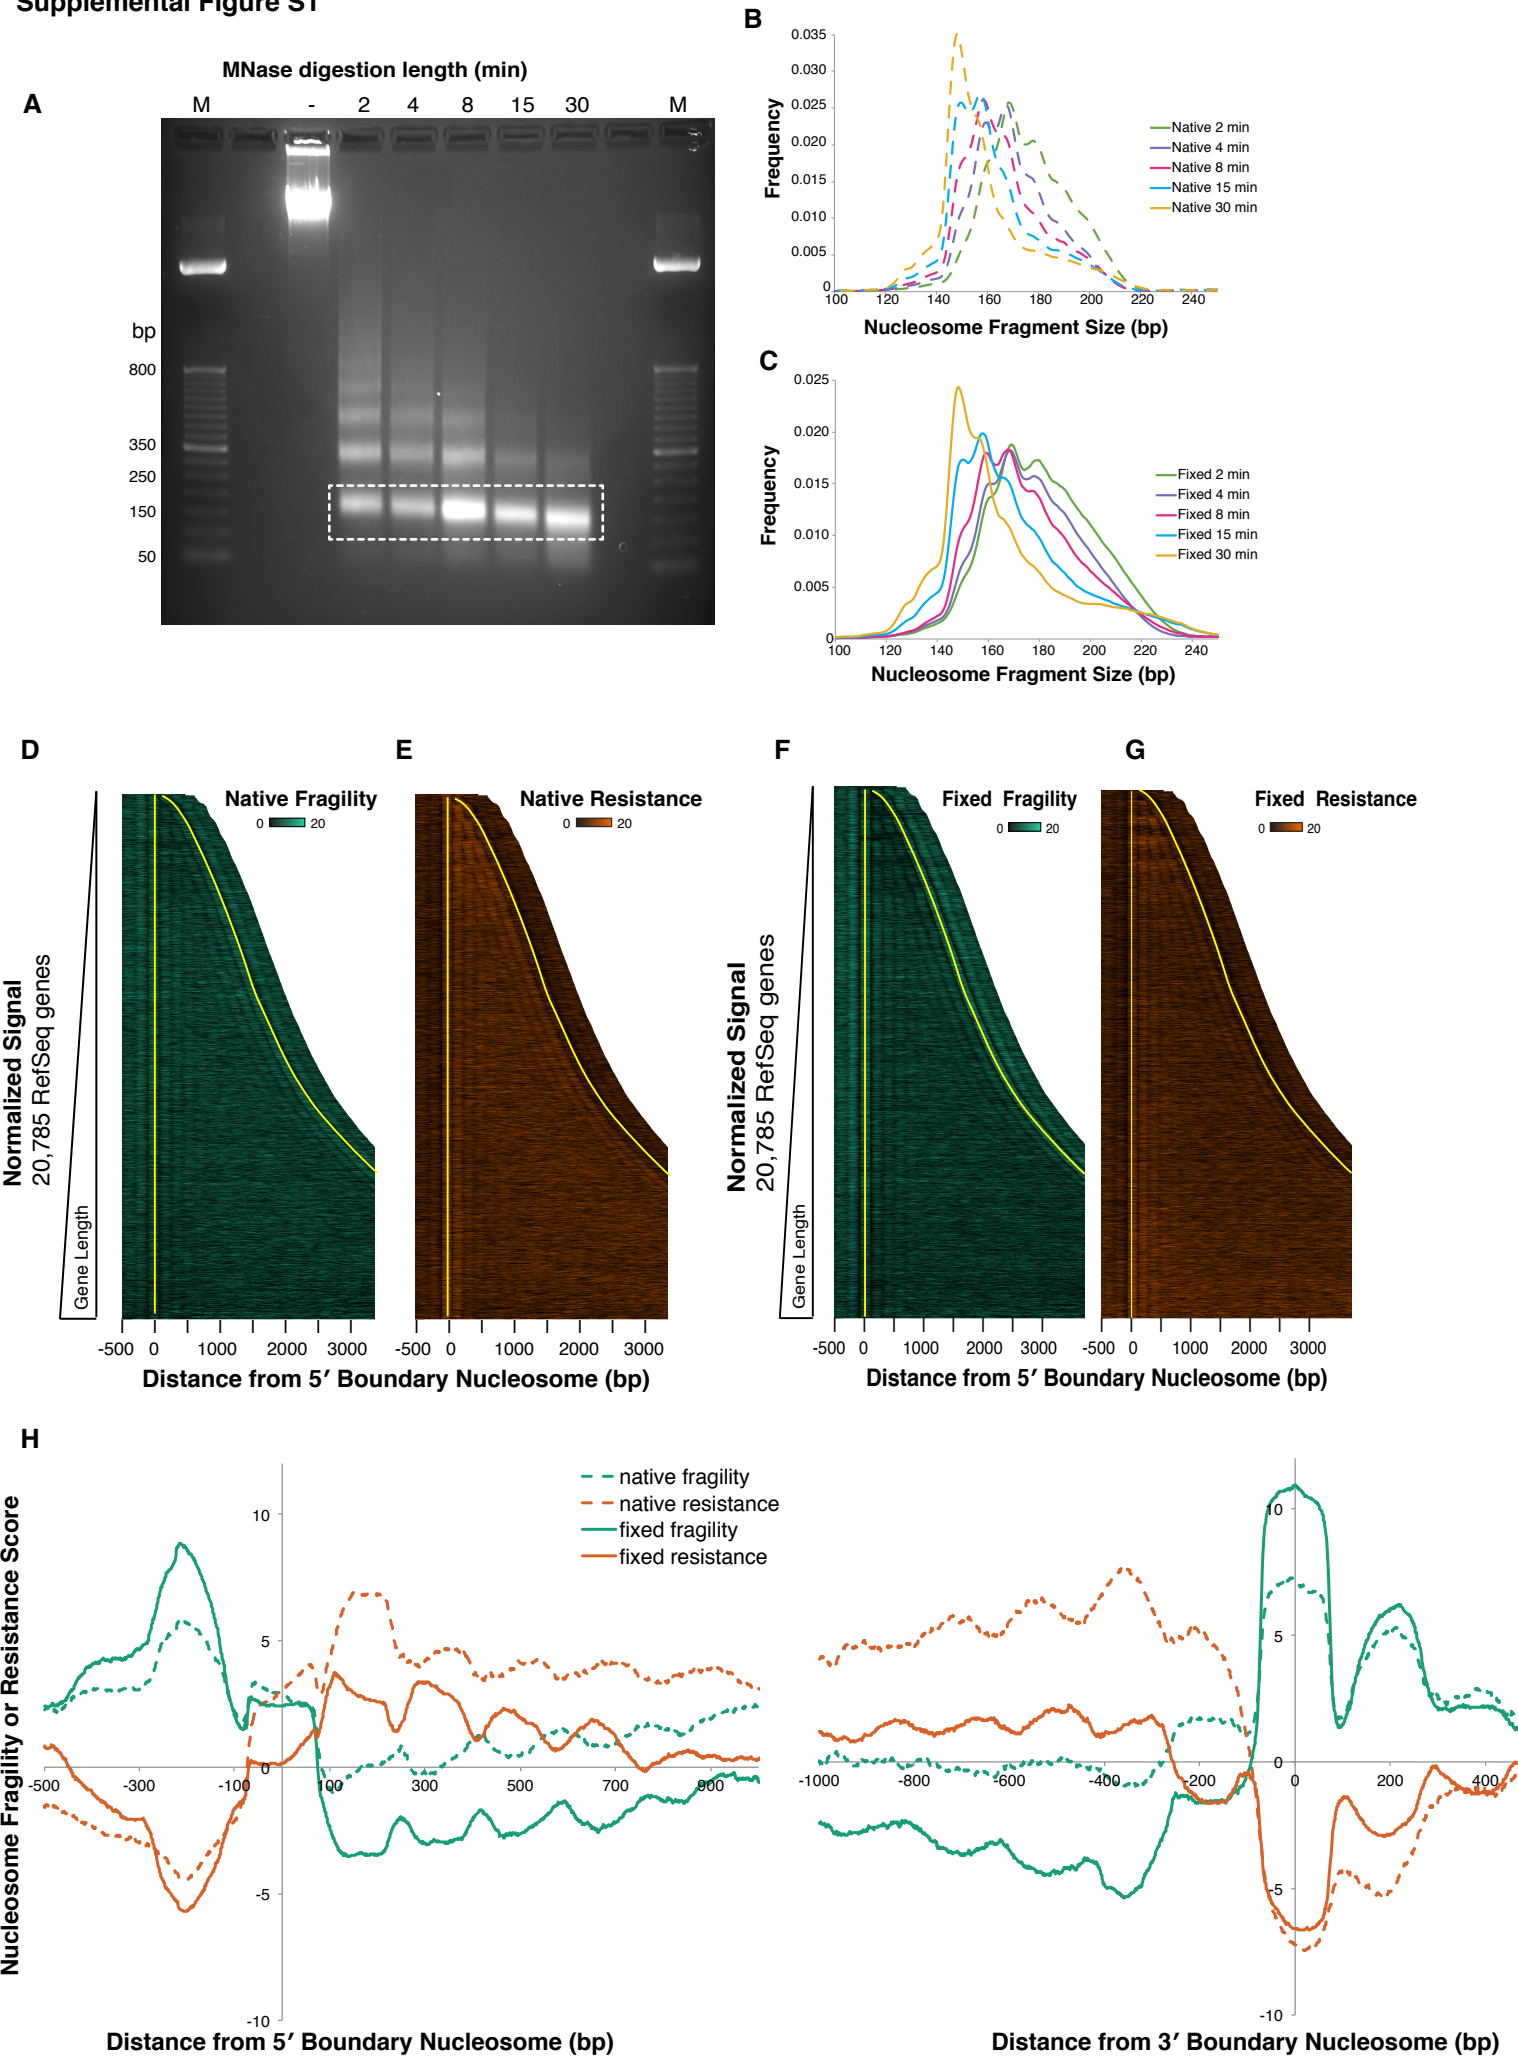

Supplement: supp_gr.208173.116_Supplemental_Fig_S1.pdf [file supp_gr.208173.116_Supplemental_Fig_S1.pdf]

Supplemental Figure S2

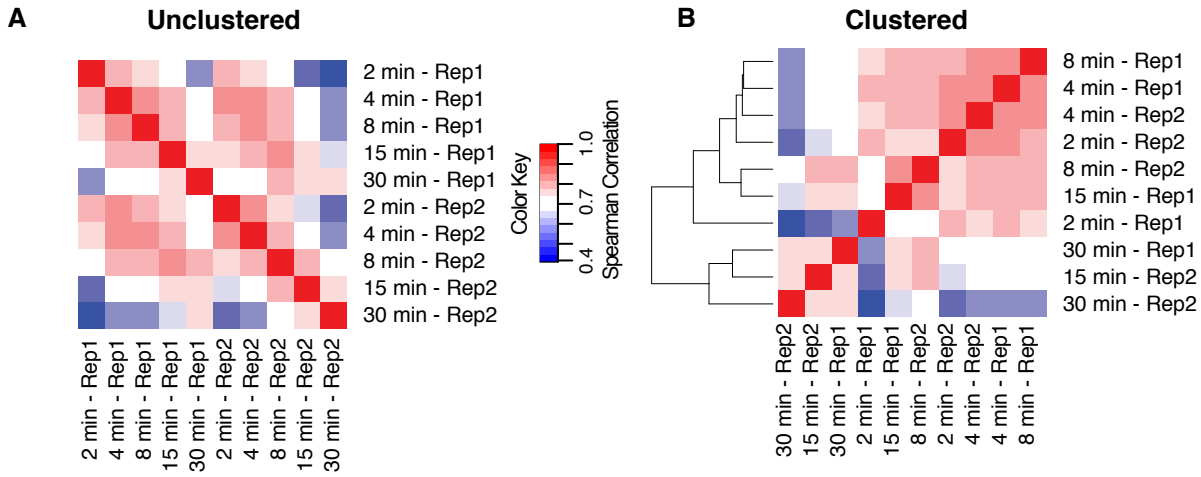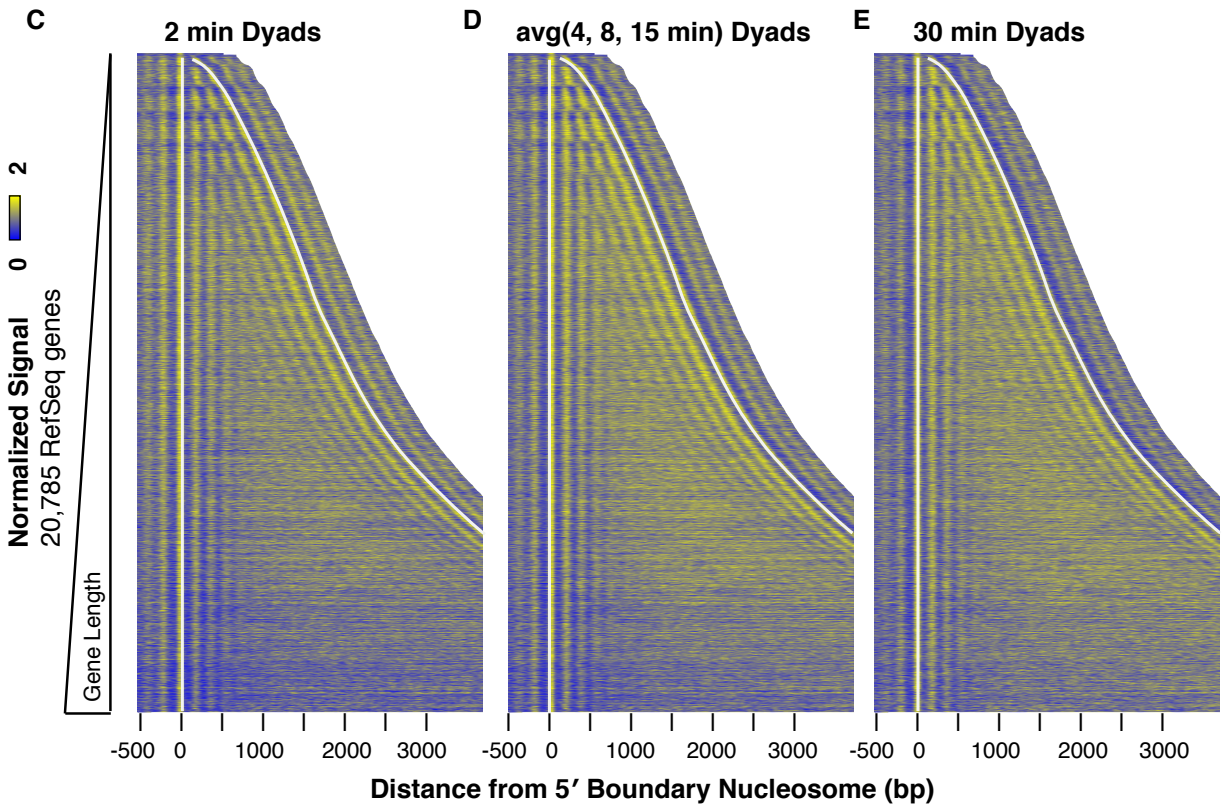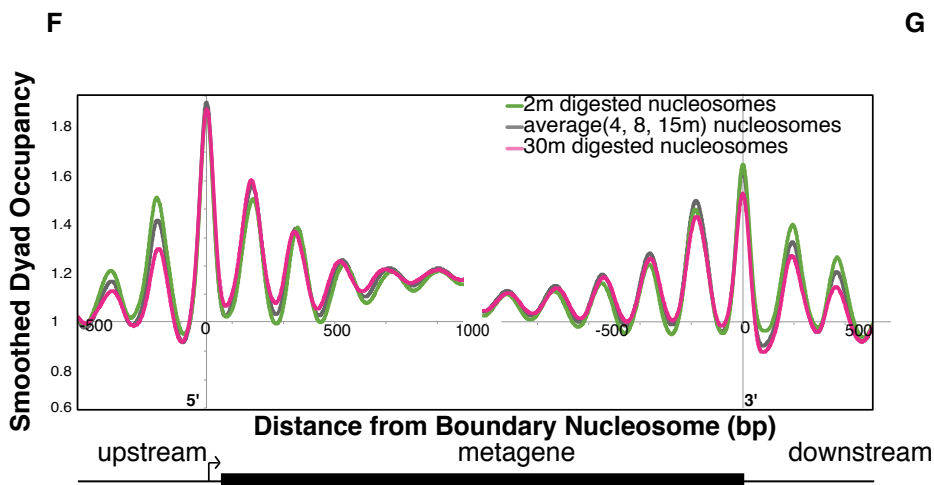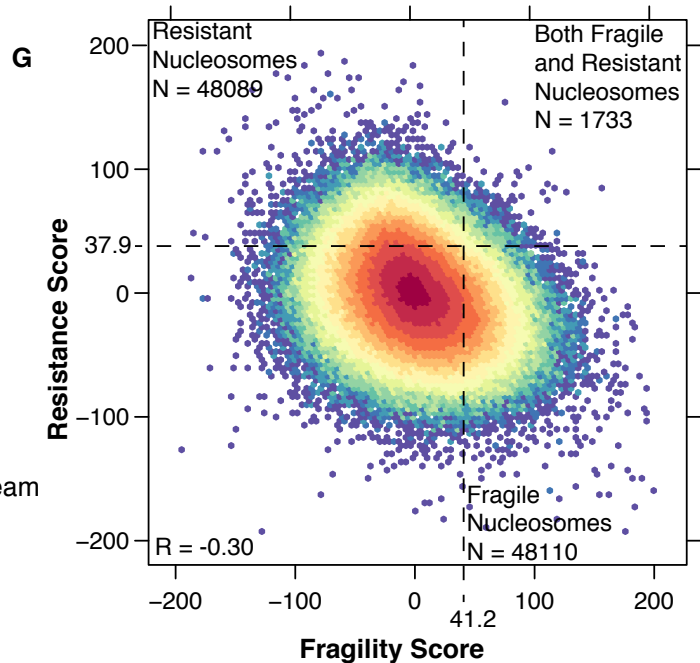

Supplement: supp_gr.208173.116_Supplemental_Fig_S2.pdf [file supp_gr.208173.116_Supplemental_Fig_S2.pdf]

Supplemental Figure S3

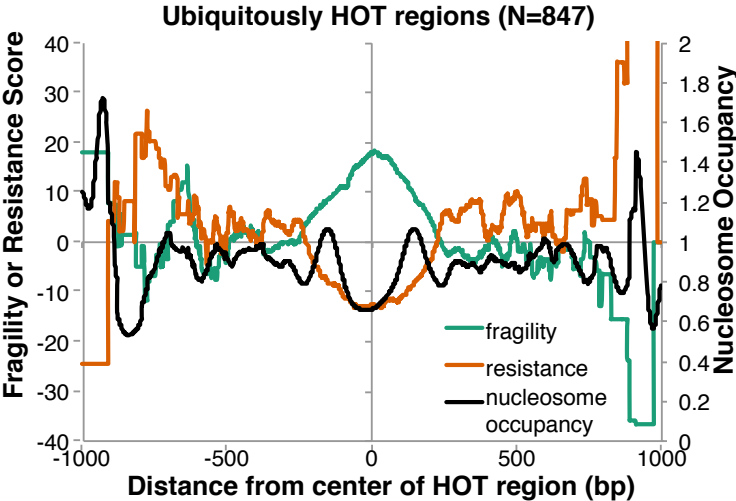

Supplement: supp_gr.208173.116_Supplemental_Fig_S3.pdf [file supp_gr.208173.116_Supplemental_Fig_S3.pdf]

## RNA-seq Scatterplot Matrix

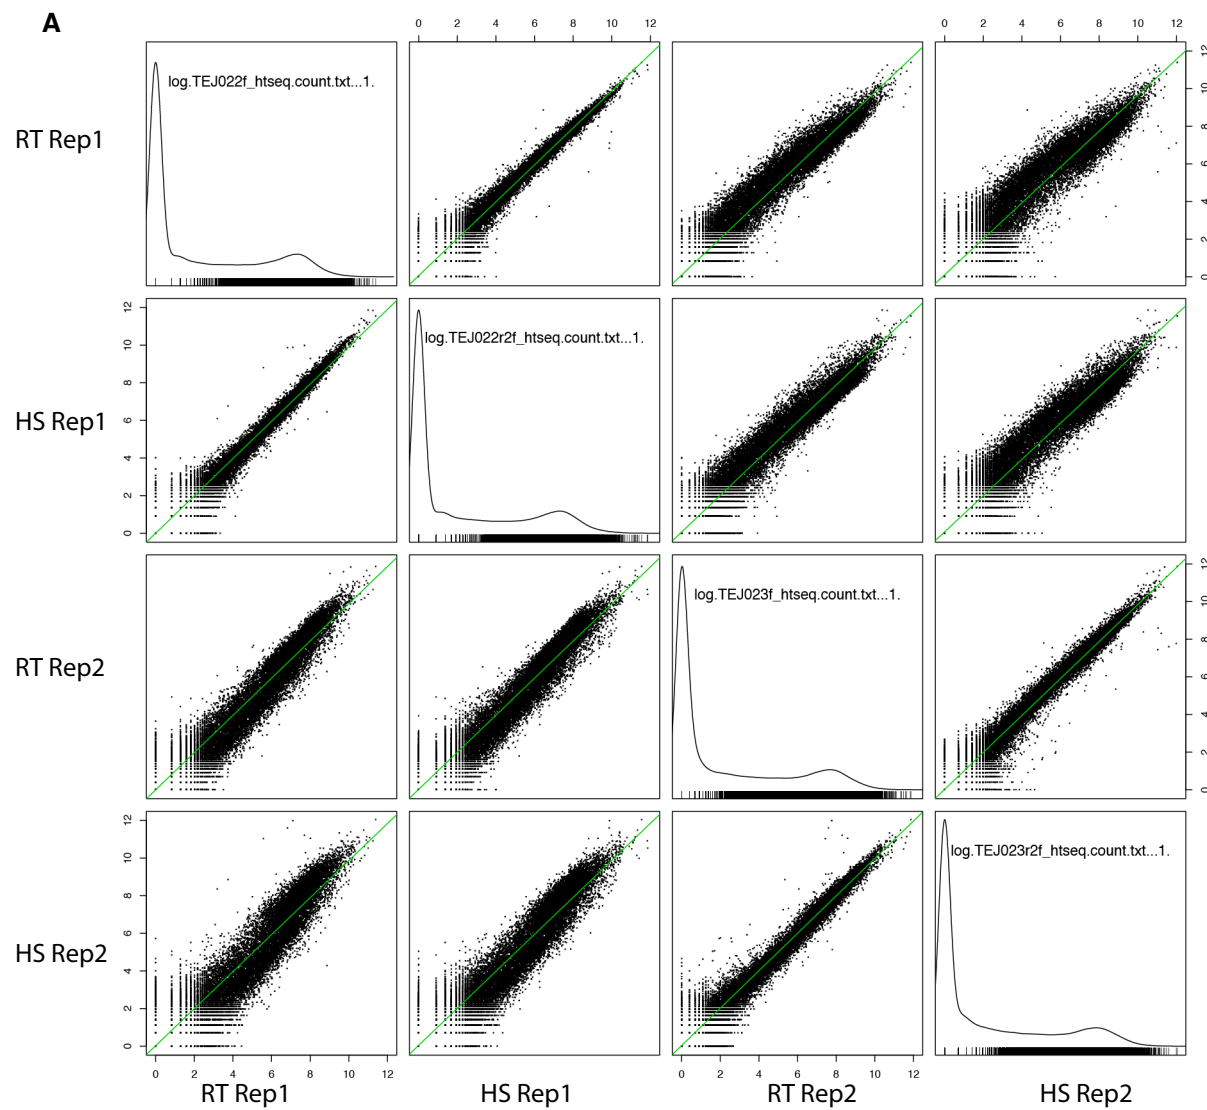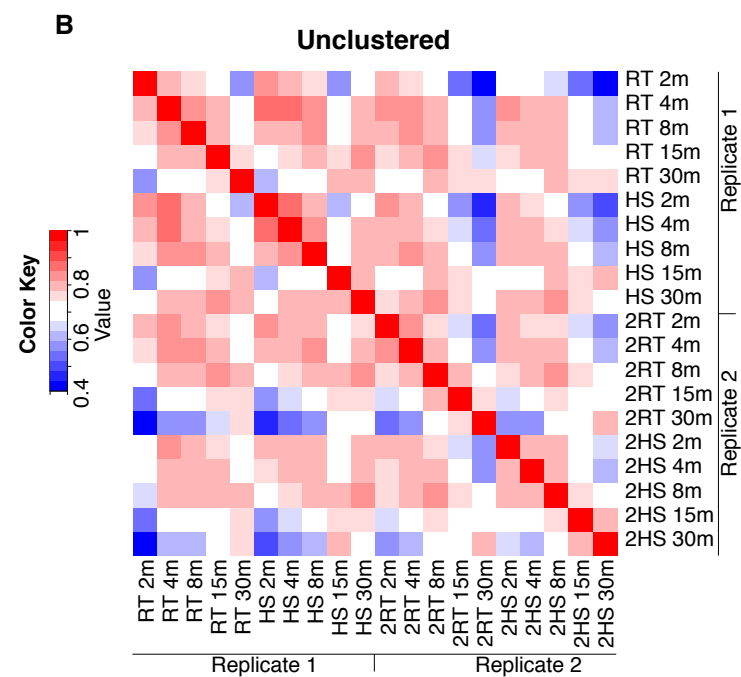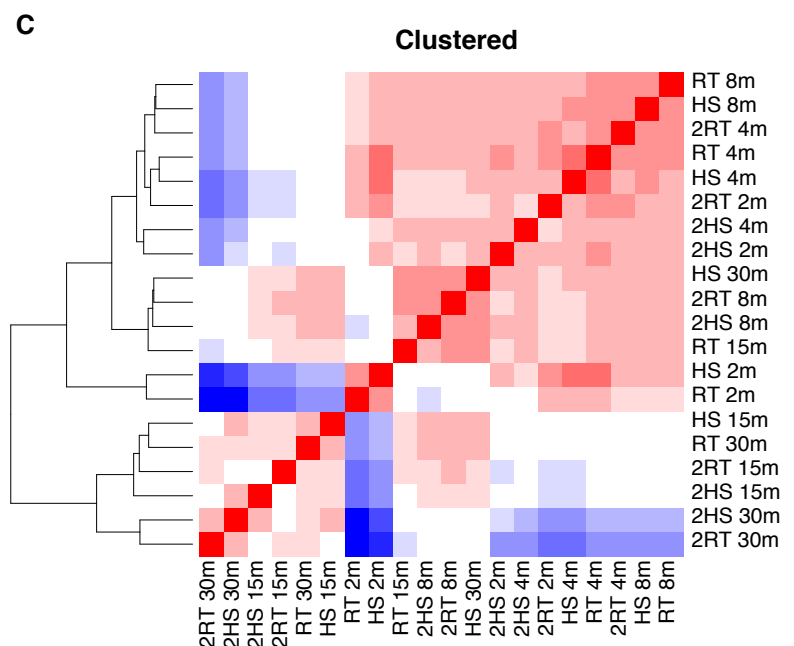

Supplement: supp_gr.208173.116_Supplemental_Fig_S4.pdf [file supp_gr.208173.116_Supplemental_Fig_S4.pdf]

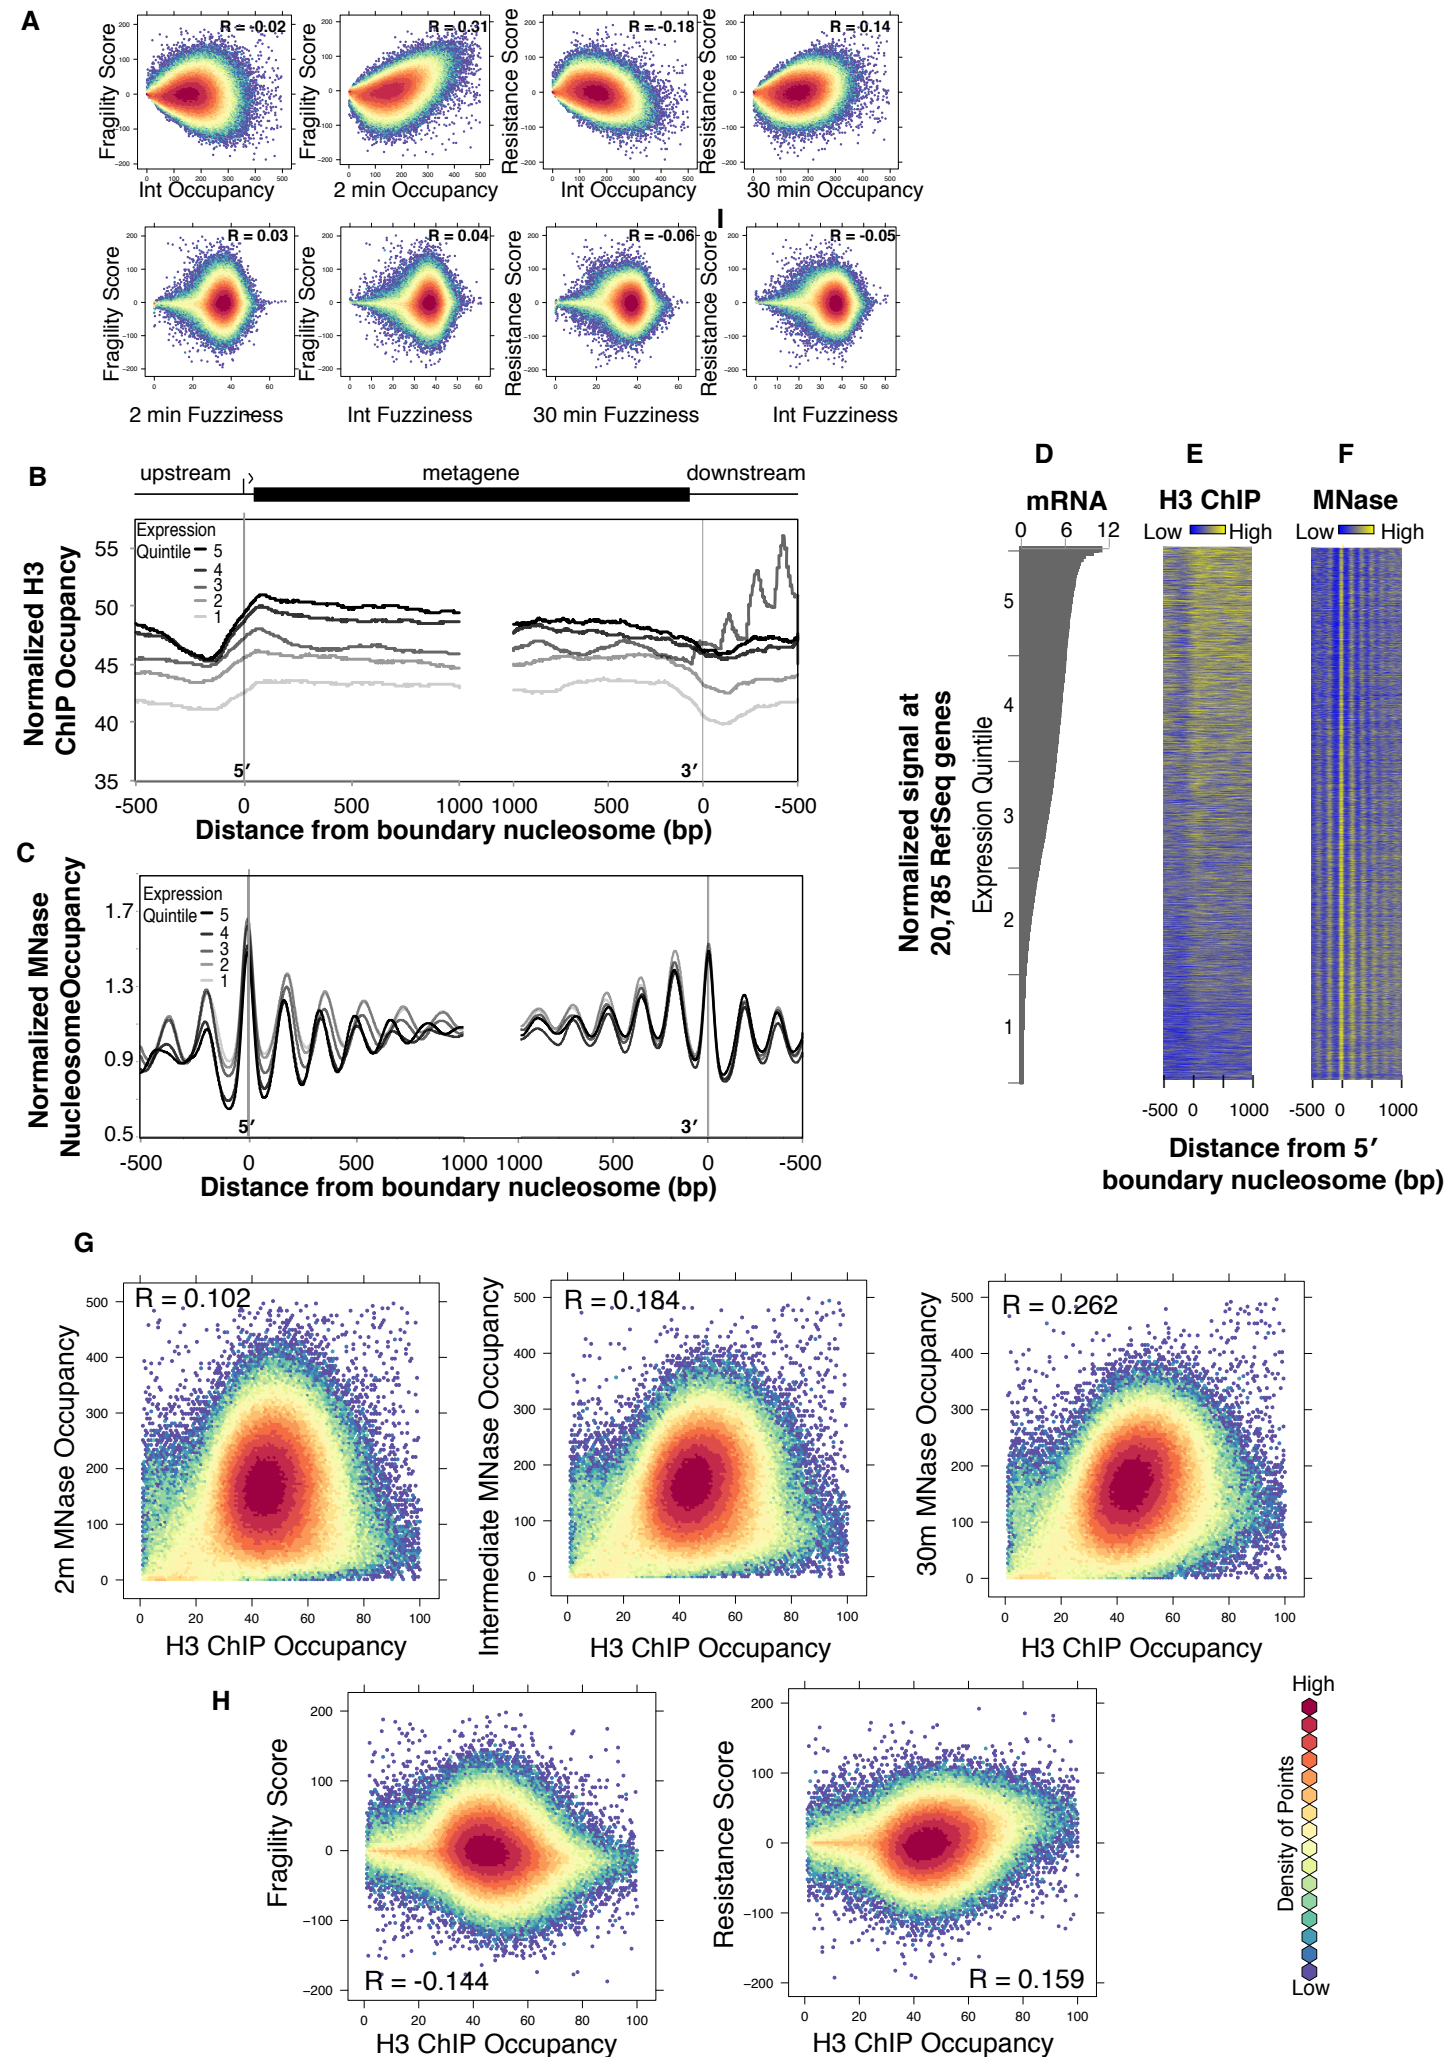

Supplement: supp_gr.208173.116_Supplemental_Fig_S5.pdf [file supp_gr.208173.116_Supplemental_Fig_S5.pdf]

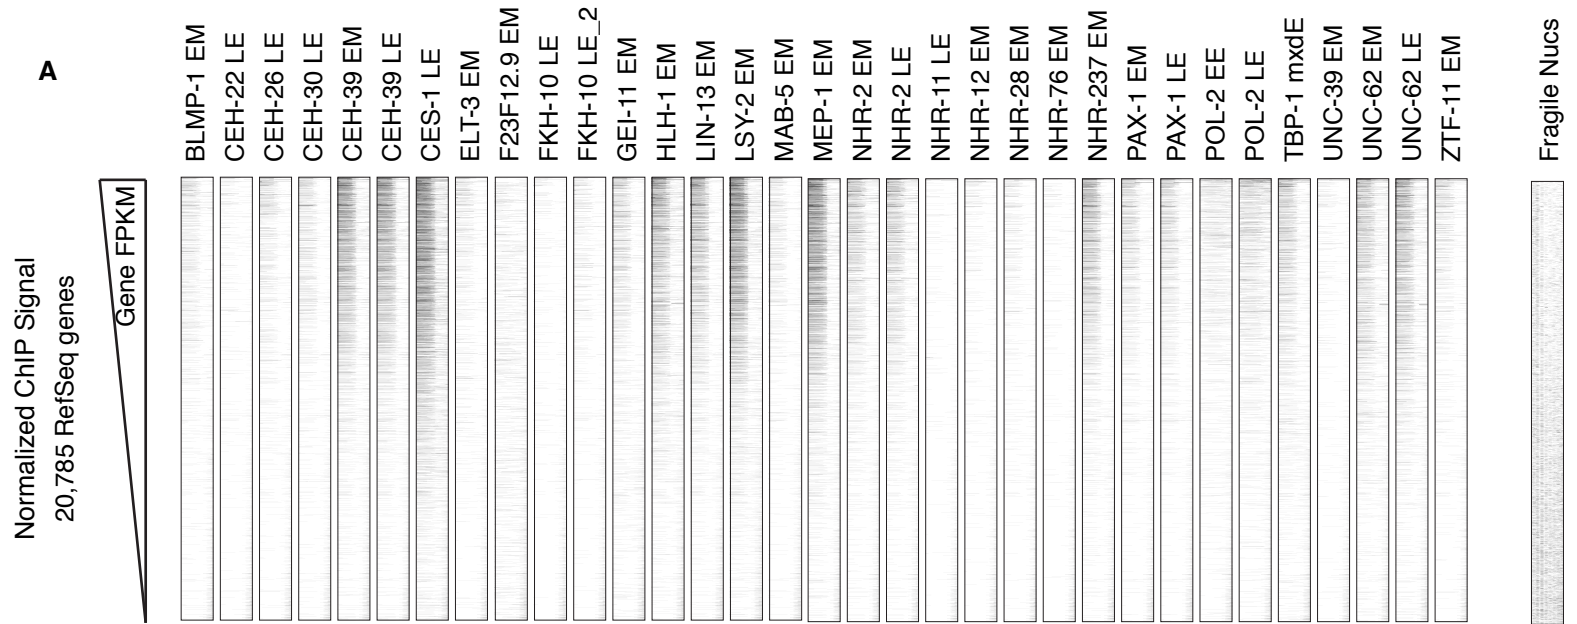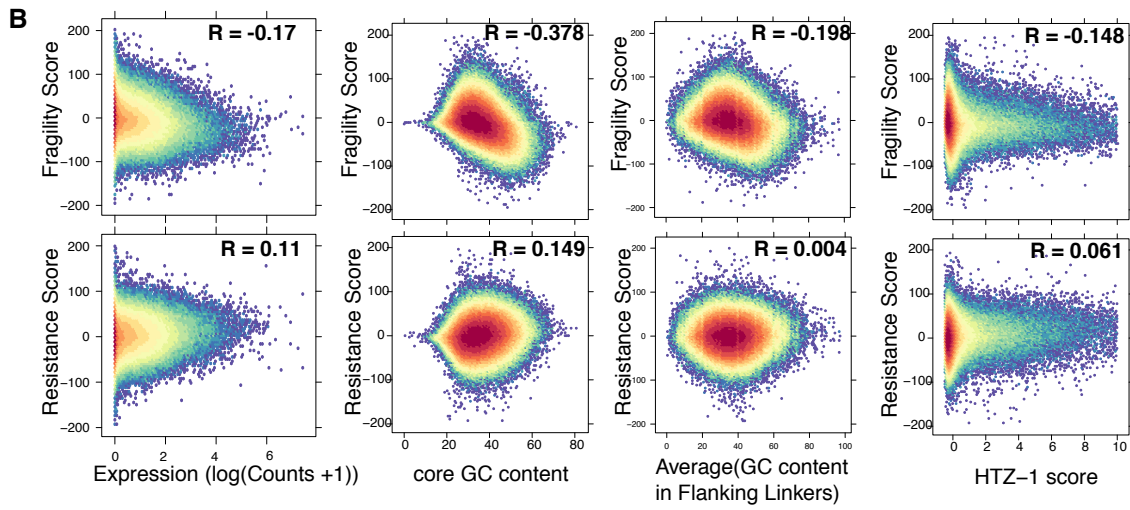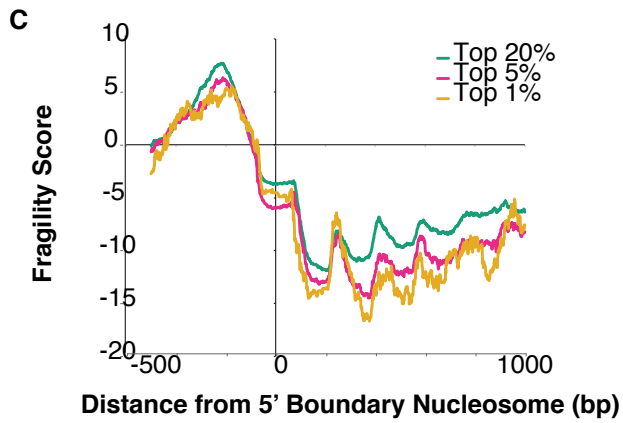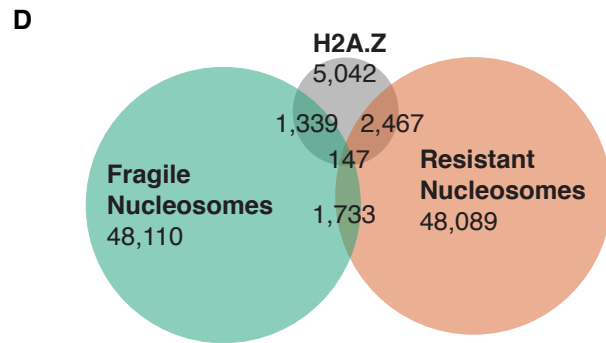

Supplement: supp_gr.208173.116_Supplemental_Fig_S6.pdf [file supp_gr.208173.116_Supplemental_Fig_S6.pdf]
